# Supplementary material for: Small RNAs Are Implicated in Regulation of Gene and Transposable Element Expression in the Protist Trichomonas vaginalis
Source: PubMed Central journal article supplement (PMC7845603; doi:10.1128/msphere.01061-20), 2021-01-06
Supplement: mSphere.01061-20-sf001.pdf [file mSphere.01061-20-sf001.pdf]

## Protists

*E. histolytica* AGO1

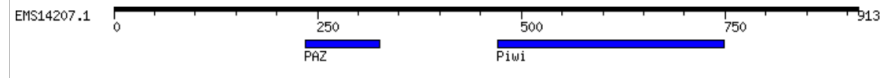

*E. histolytica* AGO2

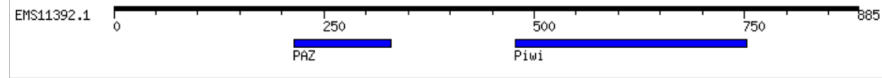

*T. vaginalis* AGO1

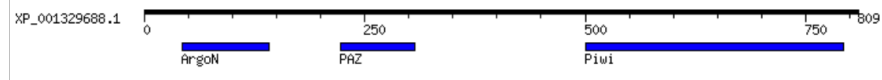

*T. vaginalis* AGO2

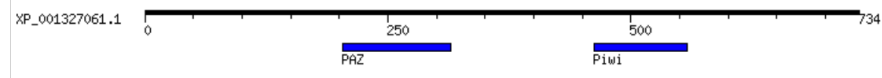

## Ciliates

*O. trifallax* OTIW1

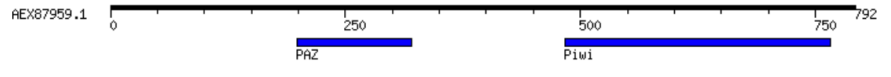

*O. trifallax* OTIW5

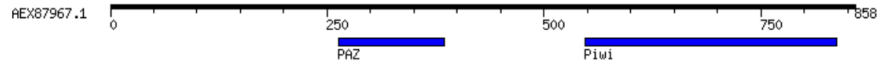

*O. trifallax* OTIW7

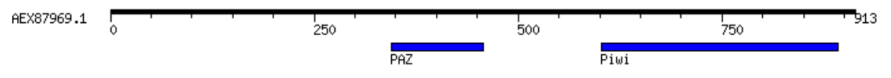

*P. tetraurelia* Ptiwi01

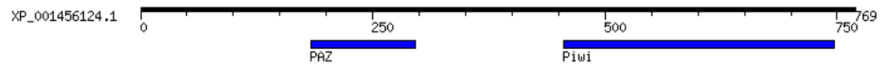

*P. tetraurelia* Ptiwi02

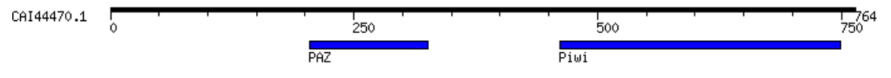

*P. tetraurelia* Ptiwi06

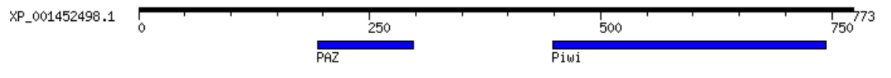

*T. thermophila* Twi10

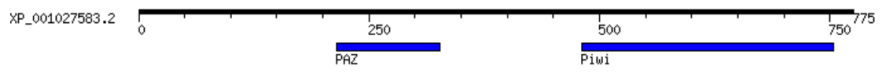

*T. thermophila* Twi11

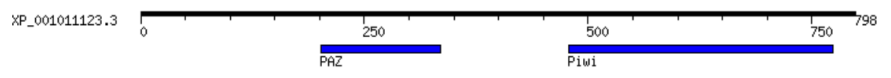

*T. thermophila* Twi12

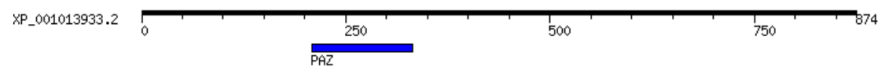

## Insects

*D. melanogaster* PIWI

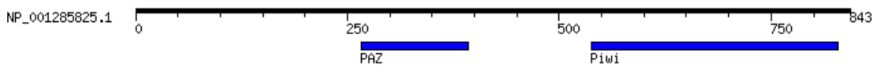

*D. melanogaster* AGO3

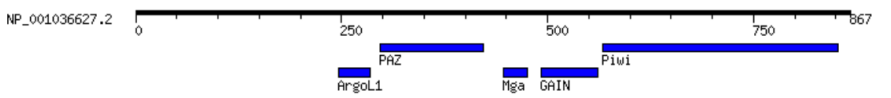

*D. melanogaster*  
aubergine

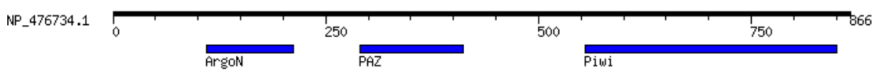

*B. mori* SIWI

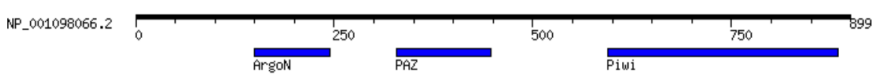

| Pfam functional domain | Pfam description                                                                                                                                                                                                                                                                   |
|------------------------|------------------------------------------------------------------------------------------------------------------------------------------------------------------------------------------------------------------------------------------------------------------------------------|
| ArgoL1 (PF08699)       | Linker region between the N-terminal and the PAZ domains found in Argonaute proteins.                                                                                                                                                                                              |
| ArgoN (PF16486)        | N-terminal domain of Argonaute proteins in Eukaryotes.                                                                                                                                                                                                                             |
| GAIN (PF16489)         | G-protein coupled receptor autoproteolysis inducing domain. Functions in cell adhesion and autoproteolysis.                                                                                                                                                                        |
| Mga (PF05043)          | M regulator protein trans-acting positive regulator is a DNA-binding protein that activates the expression of several important virulence genes in group A streptococcus in response to changing environmental conditions. This domain is found in the centre of the Mga proteins. |
| PAZ (PF02170)          | The function of the domain is unknown but has been suggested to mediate complex formation between proteins of the Piwi and Dicer families by hetero-dimerization.                                                                                                                  |
| Piwi (PF02171)         | The function of this domain is the dsRNA guided hydrolysis of single stranded RNA.                                                                                                                                                                                                 |
