# Supplementary material for: Small RNAs Are Implicated in Regulation of Gene and Transposable Element Expression in the Protist Trichomonas vaginalis
Source: PubMed Central journal article supplement (PMC7845603; doi:10.1128/msphere.01061-20), 2021-01-06

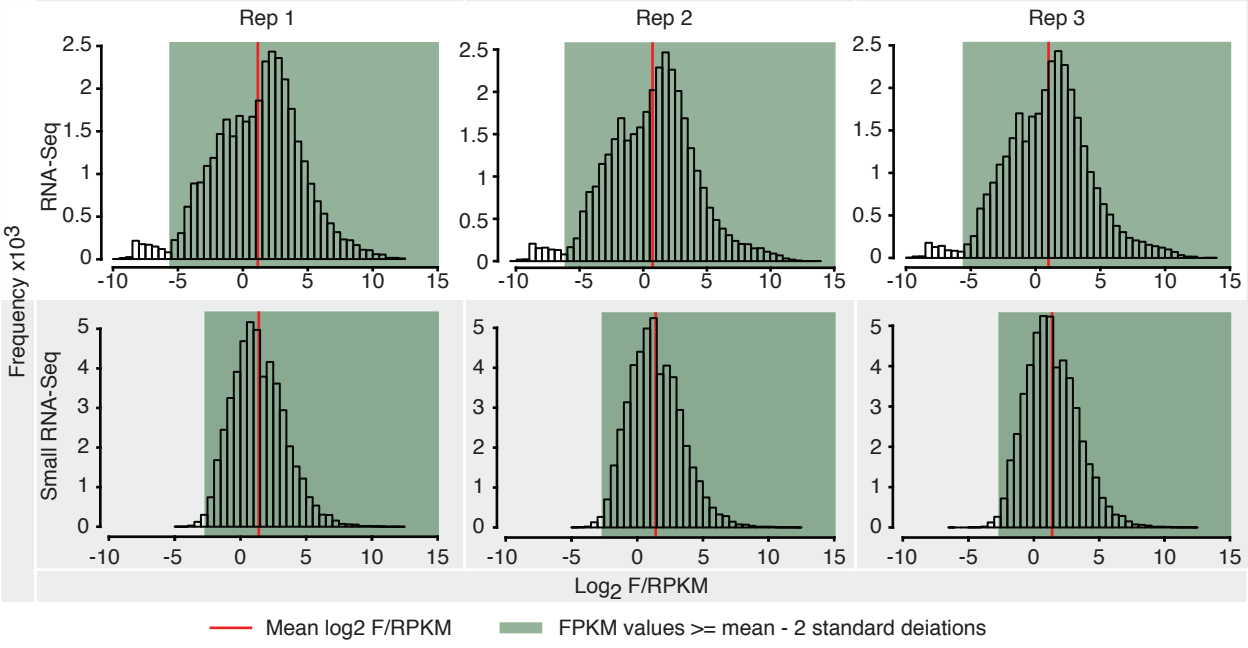

Supplement: mSphere.01061-20-sf007.pdf [file mSphere.01061-20-sf007.pdf]
